# Supplementary material for: Genes and Variants Underlying Human Congenital Lactic Acidosis—From Genetics to Personalized Treatment
Source: MDPI journal article supplement (doi:10.3390/jcm8111811), 2019-11-01
Supplement: s1 [file s1]

# Genes and variants underlying congenital lactic acidosis: from genetics to personalized treatments

## Supplementary figures

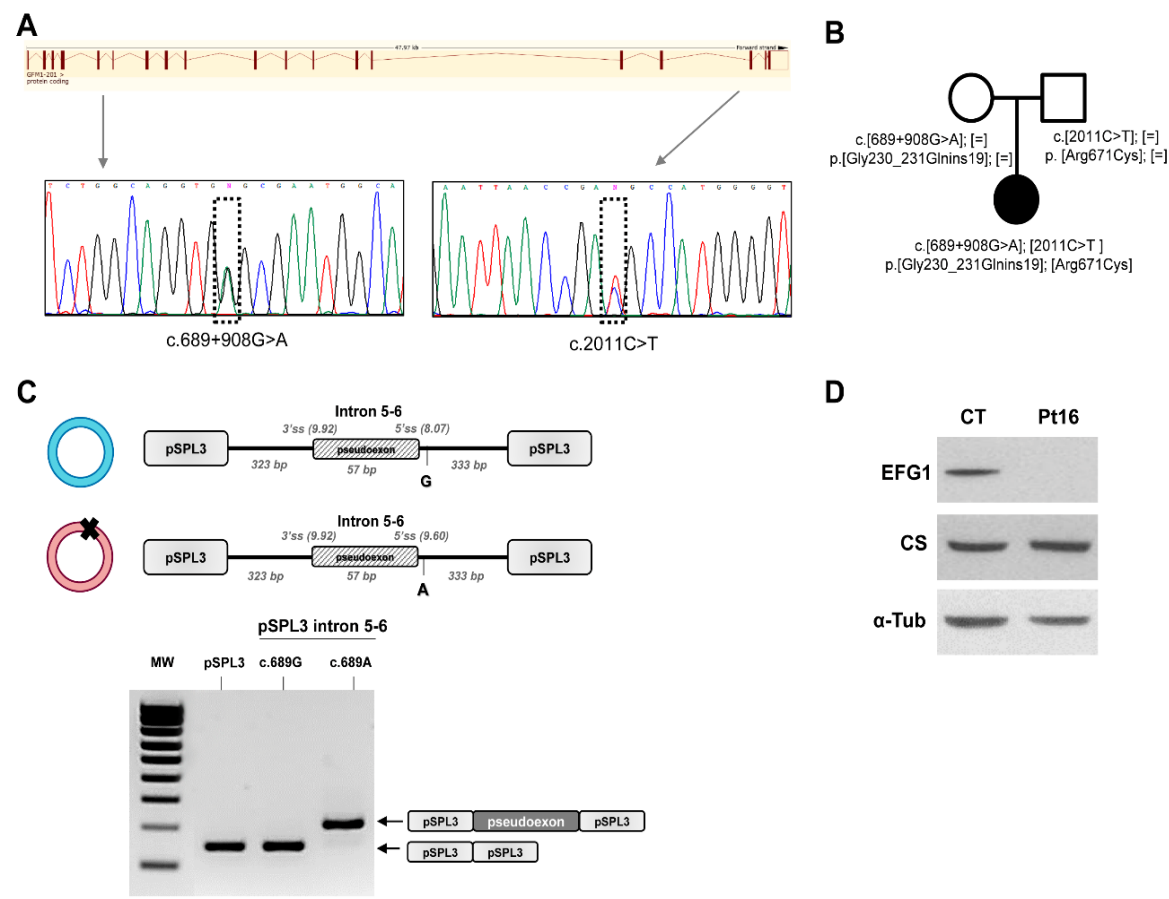

**Figure S1.** Genomic characterization of variant c.689+908G>A and effect of the change on minigenes. A) Structure of the GFM1 gene and detail of the Sanger-sequenced region around c.689+908G>A and c.2011C>T. On the right of the figure is the family pedigree. B) Minigene analysis showing a diagram of the normal and mutant pSPL3 constructs, and gel electrophoresis of the RT-PCR products for the tested minigene. The adjacent diagram is of the variant-induced change in transcript configuration. The identity of the bands was confirmed by sequence analysis.

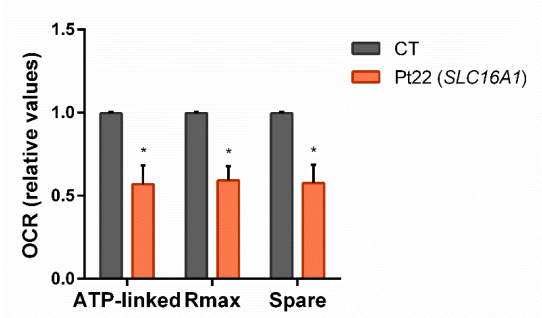

**Figure S2.** Oxygen consumption rates of fibroblasts from Pt22. The data shown are for ATP-production-dependent, maximal respiration (Rmax) and spare capacity (Spare). Results are expressed as fold over the control concentrations and are the mean  $\pm$  SD of 3-5 wells from n=2-3 independent experiments. Control values are the means of two different control cell lines. Student t test (\*p<0.05).

# Supplementary information

## Supplementary Tables

**Table S1.** Clinical phenotypes.

| Pt Code/<br>Gender                         | Family history<br>/Prenatal data                                                                                                                         | Age of onset                                                                 | Age of<br>death  | Neurological and muscular<br>features                                                                                                            | Multisystem features                                                                                                                                           | Imaging                                                                           | Biochemical and laboratory<br>findings                                                                                                                                   |
|--------------------------------------------|----------------------------------------------------------------------------------------------------------------------------------------------------------|------------------------------------------------------------------------------|------------------|--------------------------------------------------------------------------------------------------------------------------------------------------|----------------------------------------------------------------------------------------------------------------------------------------------------------------|-----------------------------------------------------------------------------------|--------------------------------------------------------------------------------------------------------------------------------------------------------------------------|
| <b>Pt1.1/ F (a)</b><br><b>Pt1.2/ M (b)</b> | Bi-amniotic twins;<br>Foetal suffering                                                                                                                   | Neonatal onset<br>HP:0003623                                                 | 36 h; 3m         |                                                                                                                                                  | Cardiomyopathy<br>HP:0001638; Neonatal<br>respiratory distress<br>HP:0002643                                                                                   | Delayed myelination<br>HP:0012448                                                 | Metabolic acidosis HP:0001942                                                                                                                                            |
| <b>Pt2/ M</b>                              | No consanguinity;<br>Premature birth<br>HP:0001622 (35wk);<br>Decreased foetal<br>movements<br>HP:0001558                                                | Neonatal onset<br>HP:0003623 (12h)                                           | 11d              |                                                                                                                                                  | Hypotension HP:0002615;<br>Patent ductus arteriosus<br>HP:0001643; Optic disc<br>pallor HP:0000543<br>(papillary pallor); Cutis<br>laxa HP:0000973             |                                                                                   | Metabolic acidosis HP:0001942;<br>Abnormal levels of creatine<br>kinase in blood HP:0040081;<br>Hypoglycaemia HP:0001943                                                 |
| <b>Pt3/ F</b>                              |                                                                                                                                                          | Infantile onset<br>HP:0003593 (3m)                                           | Alive at<br>6y   | Global developmental<br>delay HP:0001263;<br>Hypotonia HP:0001264;<br>Spastic diplegia HP:0001264                                                | Cardiomyopathy<br>HP:0001638; Nephrotic<br>syndrome HP:0000100;<br>Cataract HP:0000518;<br>Failure to thrive<br>HP:0001508; Dysmorphic<br>facies<br>HP:0001999 | Cerebral atrophy<br>HP:0002059;<br>Leukoencephalopathy<br>HP:0002352              | Metabolic acidosis HP:0001942                                                                                                                                            |
| <b>Pt4/ M</b>                              | No consanguinity;<br>Premature birth<br>HP:0001622 (31wks);<br>Severe intrauterine<br>growth retardation<br>HP:0008846;<br>Oligohydramnios<br>HP:0001562 | Neonatal onset<br>HP:0003623 (from<br>birth); Congenital<br>onset HP:0003577 | Alive at<br>3y6m | Global developmental<br>delay HP: 0001263                                                                                                        | Grade II preterm<br>intraventricular<br>haemorrhage HP:0030749                                                                                                 | Cerebellar hypoplasia<br>HP:0001321; Enlarged foetal<br>cisterna magna HP:0011427 | Metabolic ketoacidosis<br>HP:0005979                                                                                                                                     |
| <b>Pt5/ F</b>                              | No consanguinity;<br>Abnormal delivery<br>HP:0001787 (foetal<br>suffering)                                                                               | Neonatal onset<br>HP:0003623<br>(12h)                                        | 9d               | Central hypotonia HP:<br>0011398; Myoclonic<br>encephalopathy<br>HP:0010851; EEG with<br>burst-suppression<br>HP:0003198; Myopathy<br>HP:0003198 | HP: 0001399 Hepatic failure                                                                                                                                    |                                                                                   | Metabolic acidosis HP:0001942;<br>Abnormal levels of creatine<br>kinase in blood HP:0040081;<br>Elevated hepatic transaminase<br>HP:0002910; Hypoglycaemia<br>HP:0001943 |
| <b>Pt6/ M</b>                              | No consanguinity<br>Intrauterine brain                                                                                                                   | Neonatal onset<br>HP:0003623<br>(7d)                                         | ¿?               | Generalized hypotonia<br>HP:0001290; Cortical<br>dysplasia HP:0002539                                                                            | Microcephaly HP:0000252;<br>Growth delay HP:0001510                                                                                                            | Agenesis of corpus callosum<br>HP:0001274; Abnormality of<br>neuronal migration   | Metabolic acidosis HP:0001942                                                                                                                                            |

# Supplementary information

| Pt Code/<br>Gender | Family history<br>/Prenatal data                                                                                                     | Age of onset                                 | Age of<br>death  | Neurological and muscular<br>features                                                                                                                                                                               | Multisystem features                                                                                           | Imaging                                                                                                                                                | Biochemical and laboratory<br>findings                                                                                                  |
|--------------------|--------------------------------------------------------------------------------------------------------------------------------------|----------------------------------------------|------------------|---------------------------------------------------------------------------------------------------------------------------------------------------------------------------------------------------------------------|----------------------------------------------------------------------------------------------------------------|--------------------------------------------------------------------------------------------------------------------------------------------------------|-----------------------------------------------------------------------------------------------------------------------------------------|
|                    | malformation (Brain<br>atrophy HP:0012444)                                                                                           |                                              |                  |                                                                                                                                                                                                                     |                                                                                                                | HP:0002269;<br>Holoprosencephaly<br>HP:0001360                                                                                                         |                                                                                                                                         |
| <b>Pt7/ F</b>      |                                                                                                                                      | Neonatal onset<br>HP:0003623 (1d)            | 35d              | Infantile axial hypotonia<br>HP:0009062; Hypertonia<br>HP:0001276; Limb<br>dysmetria HP:0002406                                                                                                                     | Cholestasis HP:0001396                                                                                         |                                                                                                                                                        | Metabolic acidosis HP:0001942;<br>Hypoglycaemia HP:0001943                                                                              |
| <b>Pt8/F</b>       | Term                                                                                                                                 | Infantile onset<br>HP:0003593<br>(11m)       | 6y               | Infantile muscular<br>hypotonia HP:0008947;<br>Global developmental<br>delay HP: 0001263                                                                                                                            | Severe sensorineural<br>hearing impairment<br>HP:0008625; Growth delay<br>HP: 0001510                          | Normal                                                                                                                                                 | Metabolic acidosis HP:0001942;<br>Hypoglycaemia HP:0001943                                                                              |
| <b>Pt9/ F</b>      | Foetal suffering                                                                                                                     | Neonatal onset<br>HP:0003623<br>(from birth) | 3d               | Infantile axial hypotonia<br>HP:0009062; Not suction;<br>Neonatal respiratory<br>distress HP:0002643                                                                                                                | Hepatic steatosis HP:<br>0001397                                                                               | Partial agenesis of the<br>corpus callosum<br>HP:0001338; Abnormality of<br>the cerebral white matter<br>HP:0002500;<br>Ventriculomegaly<br>HP:0002119 | Metabolic acidosis HP:0001942;<br>Elevated hepatic iron<br>concentration HP:0012465;<br>Anaemia HP:0001903;<br>Hypoglycaemia HP:0001943 |
| <b>Pt10/ M</b>     | No consanguinity;<br>Bi-amniotic twins;<br>Premature birth<br>HP:0001622 (34wk);<br>Intrauterine growth<br>retardation<br>HP:0001511 | Infantile onset<br>HP:0003593<br>(7m)        | Died at<br>29m   | Generalized hypotonia<br>HP:0001290; Global<br>developmental delay HP:<br>0001263                                                                                                                                   | Pulmonary arterial<br>hypertension HP:0002092;<br>Failure to thrive<br>HP:0001508;                             | Abnormality of the cerebral<br>white matter HP:0002500;                                                                                                | Metabolic acidosis HP:0001942;                                                                                                          |
| <b>Pt11/ F</b>     | Oligohydramnios<br>HP:0001562                                                                                                        | Neonatal onset<br>HP:0003623 (from<br>birth) | Alive at<br>3y   | Psychomotor retardation<br>HP:0025356; Irritability<br>HP:0000737; Excessive<br>daytime sleepiness;<br>somnolence HP:0001262;<br>Peripheral neuropathy<br>HP:0009830; Global<br>developmental delay; HP:<br>0001263 | Renal Fanconi syndrome<br>HP:0001994; Polycystic<br>kidney dysplasia<br>HP:0000113; Growth delay<br>HP:0001510 | Abnormality of the basal<br>ganglia HP:0002134; Leigh<br>syndrome; Bilateral necrosis<br>of Grey nuclei                                                | Secondary<br>hyperparathyroidism<br>HP:0000867; Proteinuria<br>HP:0000093;<br>Hyperphosphaturia HP:<br>0003109                          |
| <b>Pt12/ M</b>     | No consanguinity;<br>Premature birth<br>HP:0001622;<br>Polyhydramnios<br>HP:0001561                                                  | Childhood onset<br>HP:0011463 (20m)          | Alive at<br>3.5y | Central hypotonia<br>HP:0011398; Seizures<br>HP:0001250; Motor delay<br>HP:0001270;<br>Hypsarrhythmia                                                                                                               | Bilateral cochlear hearing<br>loss; Dolichocephalic                                                            | Hyper intensities lesions in<br>Globus pallidus                                                                                                        | Normal                                                                                                                                  |

# Supplementary information

| Pt Code/<br>Gender | Family history<br>/Prenatal data                                                                        | Age of onset                                 | Age of<br>death | Neurological and muscular<br>features                                                                                                                                                                                                       | Multisystem features                                                                    | Imaging                                                                                                                                                                                           | Biochemical and laboratory<br>findings                                                                                                    |
|--------------------|---------------------------------------------------------------------------------------------------------|----------------------------------------------|-----------------|---------------------------------------------------------------------------------------------------------------------------------------------------------------------------------------------------------------------------------------------|-----------------------------------------------------------------------------------------|---------------------------------------------------------------------------------------------------------------------------------------------------------------------------------------------------|-------------------------------------------------------------------------------------------------------------------------------------------|
|                    |                                                                                                         |                                              |                 | HP:0002521; Hypertonia<br>HP:0001276                                                                                                                                                                                                        |                                                                                         |                                                                                                                                                                                                   |                                                                                                                                           |
| Pt13/ M            | No consanguinity;<br>Intrauterine growth<br>retardation<br>HP:0001511;<br>Oligohydramnios<br>HP:0001562 | Neonatal<br>onsetHP:0003623<br>(2d)          | 5d              | Generalized hypotonia<br>HP:0001290; EEG with<br>burst suppression<br>HP:0010851                                                                                                                                                            | Corneal opacity<br>HP:0007957;<br>Dysmorphic facies<br>HP:0001999                       |                                                                                                                                                                                                   | Metabolic acidosis HP:0001942;<br>Anaemia HP:0001903                                                                                      |
| Pt14/ M            | No consanguinity                                                                                        | Infantile onset<br>HP:0003593 (6m)           | 6m              | Generalized hypotonia<br>HP:0001290; Excessive<br>daytime somnolence<br>HP:0001262; Irritability<br>HP:0000737; Mitochondrial<br>encephalopathy<br>HP:0006789                                                                               | Arterial hypertension<br>HP:0000822; Bradycardia<br>HP:0001662; Mydriasis<br>HP:0011499 | Cerebral oedema<br>HP:0002181; Increased<br>intracranial pressure<br>HP:0002516                                                                                                                   | Thrombocytopenia                                                                                                                          |
| Pt15/ M            | No consanguinity;<br>Abnormal delivery<br>HP:0001787 (foetal<br>suffering)                              | Neonatal onset<br>HP:0003623 (from<br>birth) | 5y              | Global developmental<br>delay HP:0001263<br>Generalized hypotonia<br>HP:0001290; Seizures<br>HP:0001250; pyramidal-<br>Abnormality of<br>extrapyramidal motor<br>function HP:0002071; EEG<br>with abnormally slow<br>frequencies HP:0011203 | Intraventricular<br>haemorrhage HP:0030746                                              |                                                                                                                                                                                                   | Metabolic acidosis HP:0001942                                                                                                             |
| Pt16/ F            |                                                                                                         | Infantile onset<br>HP:0003593 (9m)           | Alive at<br>15m | Infantile axial hypotonia<br>HP:0009062;<br>Encephalopathy<br>HP:0001298                                                                                                                                                                    | Strabismus HP:0000486                                                                   | Hypoplasia of the corpus<br>callosum HP:0002079;<br>Leukoencephalopathy<br>HP:0002352<br>Delayed myelination<br>HP:0012448                                                                        |                                                                                                                                           |
| Pt17/ F            |                                                                                                         | Infantile onset<br>HP:0003593<br>(2.5m)      | Alive at<br>11y | Infantile axial hypotonia<br>HP:0009062; Irritability<br>HP:0000737;<br>Encephalopathy<br>HP:0001298; Epileptic<br>spasms HP:0011097; Global<br>developmental delay HP:<br>0001263                                                          |                                                                                         | Cerebral atrophy<br>HP:0002059 Frontal cortical<br>atrophy HP:0006913<br>Temporal cortical atrophy<br>HP:0007112Subcortical<br>cerebral atrophy<br>HP:0012157; Delayed<br>myelination HP:0012448; | Metabolic acidosis HP:0001942<br>compensated<br>Elevated hepatic transaminase<br>HP:0002910; Increased mean<br>platelet volume HP:0011877 |

## Supplementary information

| Pt Code/<br>Gender | Family history<br>/Prenatal data                             | Age of onset                                 | Age of<br>death | Neurological and muscular<br>features                                                                                                    | Multisystem features                                                        | Imaging                                                                 | Biochemical and laboratory<br>findings                                                                                                               |
|--------------------|--------------------------------------------------------------|----------------------------------------------|-----------------|------------------------------------------------------------------------------------------------------------------------------------------|-----------------------------------------------------------------------------|-------------------------------------------------------------------------|------------------------------------------------------------------------------------------------------------------------------------------------------|
|                    |                                                              |                                              |                 |                                                                                                                                          |                                                                             | Hypoplasia of the corpus<br>callosum HP:0002079                         |                                                                                                                                                      |
| Pt18/ M            | Term                                                         | Neonatal onset<br>HP:0003623 (from<br>birth) | Alive at<br>6y  | Normal psychomotor<br>developmental                                                                                                      |                                                                             |                                                                         | Metabolic acidosis HP:0001942;<br>Hyperammonemia HP:0001987;<br>Elevated hepatic transaminase<br>HP:0002910; Hypoketotic<br>hypoglycaemia HP:0001985 |
| Pt19/ M            |                                                              | Infantile onset<br>HP:0003593 (4m)           | Alive at<br>10m | Psychomotor deterioration<br>HP:0002361; Epileptic<br>encephalopathy<br>HP:0200134;<br>Epileptic spasms<br>HP:0011097 (West<br>syndrome) | Abnormal visual fixation<br>HP:0025404; Microcephaly<br>HP:0000252          | Dysplasia occipital;<br>Hypoplasia of the brainstem<br>HP:0002365       |                                                                                                                                                      |
| Pt20/ F            |                                                              | Infantile onset<br>HP:0003593<br>(3m)        | Alive at<br>1y  | Central hypotonia<br>HP:0011398;<br>Hypertonia HP:0001276;<br>Encephalopathy<br>HP:0001298;<br>Arrhythmia HP:0011675                     | Abnormal visual fixation<br>HP:0025404                                      | Bilateral alteration of central<br>nucleus and of Corpus<br>callosum    |                                                                                                                                                      |
| Pt21/ F            | No consanguinity                                             | Neonatal onset<br>HP:0003623<br>(from birth) | Alive at<br>9m  | Mild global developmental<br>delay HP:0011342                                                                                            |                                                                             | at 4 months; slight cerebral<br>cortical atrophy HP:0002120<br>in MRI   | Metabolic acidosis HP:0001942                                                                                                                        |
| Pt22/ F            | Consanguinity                                                | Infantile onset<br>HP:0003593 (6m)           | 2y3m            | Mild global developmental<br>delay HP:0011342                                                                                            |                                                                             | Agenesis of Corpus<br>callosum HP:0001274;<br>lesions in brainstem      | Metabolic acidosis HP:0001942;<br>Ketosis HP:0001946                                                                                                 |
| Pt23/ M            | No consanguinity;<br>Died cousin                             | Neonatal onset<br>HP:0003623 (24d)           | ¿?              | Irritability HP:0000737                                                                                                                  | Dilated cardiomyopathy<br>HP:0001644;<br>Horizontal nystagmus<br>HP:0000666 | Normal                                                                  | Abnormality of coagulation<br>HP:0001928                                                                                                             |
| Pt24/ F            | Consanguinity                                                | Infantile onset<br>HP:0003593<br>(9m)        | Alive 2y        | Psychomotor deterioration<br>HP0002361;<br>Infantile axial hypotonia<br>HP:0009062;<br>Abnormal pyramidal sign<br>HP:0007256             | Blindness HP:0000618                                                        | Leukodystrophy<br>HP:0002415;<br>cerebral hypomyelination<br>HP:0006808 | Metabolic acidosis HP:0001942;<br>Ketonuria; Anaemia<br>HP:0001903                                                                                   |
| Pt25/ F            | No consanguinity;<br>Preterm; Hydrops<br>foetalis HP:0001789 | Neonatal onset<br>HP:0003623<br>(from birth) | 1d              |                                                                                                                                          | Cardiomyopathy<br>HP:0001638;<br>Abnormality of the kidney                  | Lissencephaly HP:0001339                                                | Metabolic acidosis HP:0001942;<br>Elevated hepatic transaminase<br>HP:0002910                                                                        |

## Supplementary information

| Pt Code/<br>Gender | Family history<br>/Prenatal data                                           | Age of onset                          | Age of<br>death | Neurological and muscular<br>features                                                                                   | Multisystem features                                                                                  | Imaging                                                                                                                                                                         | Biochemical and laboratory<br>findings                                                                                                                                                                                                                                                            |
|--------------------|----------------------------------------------------------------------------|---------------------------------------|-----------------|-------------------------------------------------------------------------------------------------------------------------|-------------------------------------------------------------------------------------------------------|---------------------------------------------------------------------------------------------------------------------------------------------------------------------------------|---------------------------------------------------------------------------------------------------------------------------------------------------------------------------------------------------------------------------------------------------------------------------------------------------|
|                    |                                                                            |                                       |                 |                                                                                                                         | HP:0000077;<br>hepatomegaly HP: 0002240                                                               |                                                                                                                                                                                 |                                                                                                                                                                                                                                                                                                   |
| Pt26/ F            | Consanguinity                                                              | Infantile onset<br>HP:0003593 (2m)    | 7m              | Psychomotor retardation<br>HP:0025356;<br>seizures HP:0001250;<br>Laryngomalacia<br>HP:0001601                          | Nystagmus HP:0000639;<br>Horseshoe kidney<br>HP:0000085<br>Dysmorphic facies<br>HP:0001999            | Agenesis of corpus callosum<br>HP:0001274                                                                                                                                       |                                                                                                                                                                                                                                                                                                   |
| Pt27/ F            |                                                                            | Neonatal onset<br>HP:0003623<br>(5d)  | 24d             | Seizures HP:0001250;<br>Coma HP:0001259                                                                                 | Renal insufficiency<br>HP:0000083;<br>Acute hepatic failure<br>HP:0006554                             | Massive cerebral oedema<br>HP:0002181                                                                                                                                           | Metabolic acidosis HP:0001942;<br>Hyperammonemia HP:0001987;<br>Elevated hepatic transaminase<br>HP:000291;<br>Hyperbilirubinemia<br>HP:0002904;<br>Hypertriglyceridemia<br>HP:0002155<br>Hyperglycaemia HP:0003074<br>(diabetic mother);<br>Abnormality of the coagulation<br>cascade HP:0003256 |
| Pt28/ M            | No consanguinity;<br>Abnormal delivery<br>HP:0001787 (foetal<br>suffering) | Neonatal onset<br>HP:0003623<br>(1d)  | 10d             |                                                                                                                         | Renal insufficiency<br>HP:0000083                                                                     | Abnormality of the basal<br>ganglia HP:0002134;<br>Ischemic lesions in the basal<br>ganglia<br>(basal ganglia necrosis<br>HP:0012128);<br>Diffuse cerebral oedema<br>HP:0002181 | Metabolic acidosis HP:0001942;<br>Thrombocytopenia<br>HP:0001873;<br>Abnormality of the coagulation<br>cascade HP:0003256                                                                                                                                                                         |
| Pt29/ M            |                                                                            | Infantile onset<br>HP:0003593<br>(3m) | Alive<br>1.5y   | Psychomotor retardation<br>HP:0025356;<br>Abnormal cry HP:0025429;<br>Epileptic spasms<br>HP:0011097 (West<br>syndrome) | Visual fixation instability<br>HP:0025405;<br>Failure to thrive<br>HP:0001508;<br>Vomiting HP:0002013 |                                                                                                                                                                                 |                                                                                                                                                                                                                                                                                                   |
| Pt30/ F            | No consanguinity                                                           | Infantile onset<br>HP:0003593<br>(6m) |                 | Generalized hypotonia<br>HP:0001290;<br>Epileptic spasms<br>HP:0011097 (West<br>syndrome)                               |                                                                                                       |                                                                                                                                                                                 | Metabolic acidosis HP:0001942                                                                                                                                                                                                                                                                     |

# Supplementary information

| Pt Code/<br>Gender | Family history<br>/Prenatal data                                                                                | Age of onset                                 | Age of<br>death  | Neurological and muscular<br>features                                                                                            | Multisystem features                                                                                                                                                                                                                                      | Imaging                                                | Biochemical and laboratory<br>findings                                                                                                        |
|--------------------|-----------------------------------------------------------------------------------------------------------------|----------------------------------------------|------------------|----------------------------------------------------------------------------------------------------------------------------------|-----------------------------------------------------------------------------------------------------------------------------------------------------------------------------------------------------------------------------------------------------------|--------------------------------------------------------|-----------------------------------------------------------------------------------------------------------------------------------------------|
| Pt31/ M            | Premature birth<br>HP:0001622 (32 wks);<br>Hydrops foetalis<br>HP:0001789 (twins)                               | Neonatal onset<br>HP:0003623 (from<br>birth) | Alive 1y         | Epileptic spasms<br>HP:0011097 (West<br>syndrome);<br>Developmental regression<br>HP:0002376                                     | Grade I preterm<br>intraventricular<br>haemorrhage HP:0030748;<br>Bronchopulmonary<br>dysplasia ORPHA:70589<br>(abnormal respiratory<br>system morphology<br>HP:0012252;<br>Abnormal lung<br>morphology HP:0002088;<br>Respiratory distress<br>HP:0002098 | Abnormality of the cerebral<br>white matter HP:0002500 |                                                                                                                                               |
| Pt32/ F            | No consanguinity;<br>Premature birth<br>HP:0001622 (36wks);<br>Intrauterine growth<br>retardation<br>HP:0001511 | Neonatal onset<br>HP:0003623<br>(8d)         | Alive at<br>6m   | Good neuromuscular tone                                                                                                          | Hypertrophic<br>cardiomyopathy<br>HP:0001639;<br>Tachypnea HP:0002789;<br>Bradycardia HP:0001662;<br>Hepatomegaly HP:0002240;<br>Feeding refusal (poor<br>appetite HP:0004396)                                                                            |                                                        | Metabolic acidosis HP:0001942;<br>Anaemia HP:0001903                                                                                          |
| Pt33/ M            | No consanguinity                                                                                                | Neonatal onset<br>HP:0003623<br>(1d)         | Alive at<br>23y  |                                                                                                                                  | Renal Fanconi syndrome<br>HP:0001994;<br>Cholestasis HP:0001396;<br>Failure to thrive<br>HP:0001508                                                                                                                                                       |                                                        | Metabolic acidosis HP:0001942;<br>Elevated hepatic transaminase<br>HP:0002910;<br>proteinuria HP:0000093;<br>Hyperphosphaturia HP:<br>0003109 |
| Pt34/ M            |                                                                                                                 | 5m                                           | Alive at<br>13m  |                                                                                                                                  | Cardiomyopathy<br>HP:0001638                                                                                                                                                                                                                              |                                                        | Metabolic acidosis HP:0001942                                                                                                                 |
| Pt35/ M            | Consanguinity; Term                                                                                             | Neonatal onset<br>HP:0003623<br>(11d)        | Alive at<br>2y2m |                                                                                                                                  | Hepatomegaly HP:0002240;<br>Hepatic steatosis<br>HP:0001397;<br>Hepatic failure HP:0001399;<br>Malnutrition HP:0004395                                                                                                                                    | Normal                                                 | Elevated hepatic transaminase<br>HP:0002910;<br>Hyperbilirubinemia<br>HP:0002904;<br>Hyperammonemia HP:0001987;                               |
| Pt36/ M            | Previous died<br>brother                                                                                        | Infantile onset<br>HP:0003593<br>(1m)        | Alive at<br>36m  | Global developmental<br>delay HP:0001263;<br>Irritability HP:0000737;<br>Acute encephalopathy<br>HP:0006846;<br>Epileptic spasms |                                                                                                                                                                                                                                                           | Abnormality of the cerebral<br>white matter HP:0002500 | Metabolic acidosis HP:0001942                                                                                                                 |

# Supplementary information

| Pt Code/<br>Gender | Family history<br>/Prenatal data | Age of onset                                 | Age of<br>death   | Neurological and muscular<br>features                                                                                 | Multisystem features                                                                                                                          | Imaging        | Biochemical and laboratory<br>findings |
|--------------------|----------------------------------|----------------------------------------------|-------------------|-----------------------------------------------------------------------------------------------------------------------|-----------------------------------------------------------------------------------------------------------------------------------------------|----------------|----------------------------------------|
| Pt37/ F            | Term                             | Infantile onset<br>HP:0003593<br>(1.5m)      |                   | HP:0011097 (West<br>syndrome)                                                                                         |                                                                                                                                               |                |                                        |
|                    |                                  |                                              |                   | Generalized hypotonia<br>HP:0001290;<br>Encephalopathy<br>HP:0001298; Generalized<br>myoclonic seizures<br>HP:0002123 | Recurrent urinary tract<br>infections HP:0000010;<br>Abnormal involuntary eye<br>movements HP:0012547;<br>Abnormal facial shape<br>HP:0001999 |                |                                        |
| Pt38/ F            |                                  | Neonatal onset<br>HP:0003623 (from<br>birth) | Alive at<br>4m    | Infantile axial hypotonia<br>HP:0009062                                                                               | Feeding refusal (Poor<br>appetite) HP:0004396)                                                                                                |                | Hypoglycaemia HP:0001943               |
| Pt39/ F            | Term                             | Neonatal onset<br>HP:0003623<br>(28d)        | Alive at<br>3y10m | Neurologic hyper<br>excitability                                                                                      |                                                                                                                                               | Leigh syndrome | Metabolic acidosis HP:0001942          |

Abbreviations: Female (F); male (M); hours (h); days (d); weeks (wk); months (m); years (y). HPO terms follow Human Phenotype Ontology terms (<https://hpo.jax.org/app/>); a and b biamniotic twins (only a was considered).

**Table S2.** Biochemical data.

| Pt Code                | Lactate<br>plasma | Lactate<br>CSF | Others<br>plasma                     | Acyl-Carnit<br>plasma                | Lactate<br>urine | Organic Acids<br>urine                                                                                      | Cell studies                                                                                   | MDC      |
|------------------------|-------------------|----------------|--------------------------------------|--------------------------------------|------------------|-------------------------------------------------------------------------------------------------------------|------------------------------------------------------------------------------------------------|----------|
| Pt1.1 (a)<br>Pt1.2 (b) | 12<br>7.4         |                | Ala 2X; Tau 4.3X<br>Ala: Normal      | Normal                               | 10396            | 2HB; 4HPL; 4HPP                                                                                             | Mitochondrial proliferation<br>in M; Moderately<br>decreased RC in M (a)and<br>FB (b)          | Definite |
| Pt2                    | 16.7              |                | Ala: Normal                          | C0                                   | 23167            | 2HB; 3HB; 4HPL; 2HVA                                                                                        | CoQ10 Normal in FB                                                                             | Definite |
| Pt3                    | 12.2              | 3.9            | Ala 1.4X; Cit 3.5X↓;<br>Pipelicolic↑ | C0, C3, C4,<br>C5OH, C10OH,<br>C18OH | 414              | 2HB; 3HB; AcAc; 3MGC                                                                                        | PC, PDH, 1-14C pyr; 2-14C<br>pyr; 1-14C glutamate<br>oxidation Normal in FB; RC<br>Normal in M | Definite |
| Pt4                    | 12.2              |                | Ala 7X                               | C2; C3                               | 127476           | 2HB; 3HB; AcAc; 4HPL;<br>4HPP; Fum; Mal; 3MGA;<br>3HGA; 3MGC; 3Hprop;<br>3HIVA; Adipic; 3H-<br>DC10; orotic |                                                                                                | Definite |



## Supplementary information

| Pt Code | Lactate plasma | Lactate CSF | Others plasma                                                      | Acyl-Carnit plasma | Lactate urine | Organic Acids urine                                                        | Cell studies                                                                             | MDC      |
|---------|----------------|-------------|--------------------------------------------------------------------|--------------------|---------------|----------------------------------------------------------------------------|------------------------------------------------------------------------------------------|----------|
| Pt5     | 30             |             | Ala 3.8 X; Tyr 3.1X                                                |                    | 34000         | 2HB; 3HB                                                                   | PC Normal in FB, RC and PDH Normal in M. No mtDNA depletion                              | Definite |
| Pt6     | 13.9           | 10.3        | Ala 1.8X                                                           |                    | 1444          | 2HB; 3HB; AcAc; 4HPA; Fum; Mal                                             | PC Normal in FB                                                                          | Definite |
| Pt7     | 20             |             | No data                                                            |                    | 10854         | 2HB; 3HB; AcAc; 4HPA; 4HPL; 4HPP; 3Hprop; 2HIVA; 3H-DC10:1                 | PC Normal in FB                                                                          | Definite |
| Pt8     | 9              |             | Ala 1.7X                                                           | Normal             | 1368          | 2HB; 3HB; AcAc; 2-KGA; Fum; 3Hprop; 3H-DC10:1                              | PC Normal in FB                                                                          | Definite |
| Pt9     | 11.7           | 13.2        | Aa: Normal                                                         |                    | 5528          | 2HB; 4HPL; 3HIB; 2HIVA; Fum                                                | RC Normal in liver, CII+III slightly decreased in FB; PC Normal in FB                    | Definite |
| Pt10    | 7.1            |             | Aa: Normal                                                         | C2                 | Normal        | Succ; Fum; Mal; 3MGC; 2HGA; 3H-3MGA                                        | RC slightly decreased in FB; CoQ10 decreased in LF                                       | Definite |
| Pt11    | 5.5            |             | No data                                                            | C5-DC, C6-DC       | 4946          | 2HB; 3HB; 4HPL; 4HPP; AcAc; 2-KGA; 2HGA; GA; Fum; 2H-Adip, 2K-Adip,        | ↓CI, CIII and CIV in M; Myopathic alteration with signs of mitochondrial alteration      | Definite |
| Pt12    | 4.7            | 2.87        | Ala 2.1X                                                           | Normal             | 337           | Normal                                                                     | RC Normal in M                                                                           | Definite |
| Pt13    | 20             |             | Ala 2.7X; Lys 2.5X; Pro 1.9X; Tyr 3.8X; Cystathionine 6.8X         | Normal             | 26399         | 2HB; 4HPL; 4HPP; 3HIB; Fum; 3MGA; 3MGC                                     | PC Normal in FB                                                                          | Definite |
| Pt14    | 4.1            | 5.8         | Aa: Normal                                                         | Normal             | 681           | 2HB; 3HB; AcAc; Vanilmandelic;                                             | PC Normal in FB                                                                          | Definite |
| Pt15    | 4.5-5.03       | 3.93        | Aa: Normal                                                         |                    | Normal        | Normal                                                                     | PC, PDH, 1-14C pyr, 2-14C pyr; 1-14C glutamate oxidation Normal in FB and RC Normal in M | Probable |
| Pt16    | 4              | 2.19        | Ala: Normal                                                        | Normal             | Normal        | Normal                                                                     |                                                                                          | Probable |
| Pt17    | 5.2            | 7.8         | Ala 1.7X                                                           |                    |               |                                                                            | PC Normal in LF                                                                          | Probable |
| Pt18    | 13.8           | 7.5         | Val 2.4X; Ile 2X; Leu 3.6X; Tyr 2.X; Lys 2.6X; Cit 4.4X; Alolfeu ↑ | C16:1OH            | 204258        | 2HB; 4HPL; 4HPP; AcAc; 2-KGA; 2HIVA; 2H,3M-VA; 2H-isocaproic; 2HGA; 3Hprop | Dihydrolipoamide dehydrogenase activity <3% in FB                                        | Probable |

## Supplementary information

| Pt Code | Lactate plasma | Lactate CSF | Others plasma                                        | Acyl-Carnit plasma       | Lactate urine | Organic Acids urine                                                   | Cell studies                                                                          | MDC      |
|---------|----------------|-------------|------------------------------------------------------|--------------------------|---------------|-----------------------------------------------------------------------|---------------------------------------------------------------------------------------|----------|
| Pt19    | 3.1-10.6       |             | Ala: Normal                                          | Normal                   | 200           | Normal                                                                |                                                                                       | Probable |
| Pt20    | 6              | 8           | Cit 2.4X↓                                            | C0                       | 2827          | 2HB; 3HB; 4HPP; 2-KG; Fum                                             | PC and Dihydrolipoamide dehydrogenase activity Normal in FB; RC Normal in M           | Probable |
| Pt21    | 14.7           |             | Ala 4.6X; Pro 3.3X; Cit not detectable               |                          | 1917          | 2HB; 3HB, AcAc, 3Hprop, 2M,3HB, 3HIVA, Fum, Mal, 2H-Glut              | PC Normal and PDH Decrease in FB                                                      | Probable |
| Pt22    | 7              | 1.7         | Aa: Normal values; Ketone Bodies↑                    | Normal                   | 9312          | 2HB; 3HB; AcAc; 3Hprop; 2HIVA; 3HIVA                                  |                                                                                       | Probable |
| Pt23    | 6.4            | 1.77        | Ala 2X; Pro 2.4X; Met 2.7X; Tyr 2.9X; uric acid 1.5X | ↓C0, C3                  | 7274          | 2HB; 3HB; 4HPP; 4HPL; AcAc; 2-KGA; Fum                                | PC; PDH; 1-14C pyr; 2-14C pyr; 1-14C glutamate oxidation in FB Normal                 | Probable |
| Pt24    | 11.7           |             | Ala 3X                                               | C6, C8:1, C8, C10:1, C10 | 4151          | 2HB; 3HB; AcAc; 2-KG; Succ, Fum; Mal; 4HPP; 2HGA, 3HGA, 3HIVA, 3Hprop | PC Normal in LF, PDH and RC Normal in M                                               | Probable |
| Pt25    | 11.5           |             | no data                                              | Normal                   | 2772          | 2HB; 2-KG; Succ; Fum; Mal; 3Hprop, GA, 2HGA, 4HPL                     | PC Normal in FB                                                                       | Probable |
| Pt26    | 3              | 3.81        | Aa: Normal                                           | Normal                   | 1958          | 2HGA, 2-KGA, Succ, Fum, 4HPA                                          | PC; PDH; 1-14C pyr; 2-14C pyr; 1-14C glutamate oxidation in FB Normal, RC Normal in M | Probable |
| Pt27    | 16.6           |             | Pro 1.8X                                             | C0; C2-C6                | 63607         | 2HB; 3HB; AcAc; 4HPP; 4HPL; Homovanilic                               | PC Normal in FB; RC Normal in M                                                       | Probable |
| Pt28    | 9.1            | 9.42        | Aa: Normal                                           | C0                       |               |                                                                       | PC 43% in FB                                                                          | Probable |
| Pt29    | 6.1            |             | Ala 1.3X                                             |                          | Normal        | Normal                                                                | RC Normal in M; no mtDNA depletion; PC 39% in FB                                      | Probable |
| Pt30    | 8              | 2.82        | Ala 2.1X                                             |                          | 4497          | 2HB; AcAc; 3Hprop; 3HIVA; 4HPA; Valproate treatment                   |                                                                                       | Probable |
| Pt31    | 4.0-3.0        |             | Ala 2.6X                                             | Normal                   | 5869          | 2HB; 3HB; AcAc; 3Hprop; 3HIVA; Valproate treatment                    | Slightly decrease of CoQ10 in LF                                                      | Probable |

# Supplementary information

| Pt Code | Lactate plasma | Lactate CSF | Others plasma                                           | Acyl-Carnit plasma | Lactate urine | Organic Acids urine                                                      | Cell studies                                       | MDC      |
|---------|----------------|-------------|---------------------------------------------------------|--------------------|---------------|--------------------------------------------------------------------------|----------------------------------------------------|----------|
| Pt32    | 11             | Normal      | no data                                                 |                    | 66425         | 2HB; 3HB; AcAc; 4HPL; 4HPP; 3Hprop; 2HIVA                                | PC Normal in LF and FB; PDH Normal FB              | Probable |
| Pt33    | Elevated       |             | Cit 2X                                                  |                    | Elevated      | KB                                                                       | CIII deficiency in M                               | Possible |
| Pt34    |                |             |                                                         |                    |               |                                                                          | PC Normal in FB                                    | Possible |
| Pt35    | 11.6           |             | Cit 2X; Val, Ileu+Leu N                                 |                    | 3340          | 2HB; 4HPL; 4HPP; 2HIVA; 3HIVA; 2H-Adipic; 2K-Adipic                      | Dihydrolipoamide dehydrogenase activity <10% in FB | Possible |
| Pt36    | 4.0-6.0        |             | Cit 2X                                                  | Normal             | Normal        | 2H-Adipic                                                                | PC and PDH Normal in FB                            | Possible |
| Pt37    | 5.6            |             | Ala: Normal                                             | Normal             |               | 2-KGA                                                                    |                                                    | Possible |
| Pt38    | 18             |             | Ala 1.6X; Cit 7.4X↓                                     | Normal             | 328807        | 2HB; 3HB; AcAc; 4HPL; Fum; Mal; 3Hprop; 2HIVA; 2M, 2HB; 3HIVA; 3H-DC10:1 | PC Normal in LF; RC Normal in M                    | Possible |
| Pt39    | ↑↑             |             | Aa: Normal; Free thiamine in whole blood not detectable | Normal             | 1010          | 2-KGA                                                                    |                                                    |          |

Abbreviations: Amino acids (Aa); Ketone Bodies (KB); AcAc (acetoacetic); hydroxy (H); methyl (M); iso (I); keto (K); Valeric (VA); butyric (B) dicarboxylic acids (Adipic and Suberic) (DC); 4-OHphenyllactic (4HPL); 4-OHphenylpyruvic (4HPP); 4-OHphenylacetic (4HPA); Fumarate (Fum); Malate (Mal); Succinate (Succ); Glutaric (GA); Glutaconic (GC); Lactic (L); Pyruvic (P); Propionic (prop); Ethylmalonic (EMA)); Increased presence of C0: free carnitine, C2: acetylcarnitine, C3: propionylcarnitine, C4: butyryl+isobutyrylcarnitine, C5DC: glutaryl carnitine, C5OH: 3-hydroxyisovalerylcarnitine, C6: hexanoylcarnitine, C6DC: adipyl+methylglutaryl carnitine, C8: octanoylcarnitine, C8:1: octenoylcarnitine, C10: decanoylcarnitine, C10:1: decenoylcarnitine, C10OH: 3-hydroxydecanoylcarnitine, C16:1: palmitoleylcarnitine, C16:1OH: 3-hydroxypalmitoleylcarnitine, C18OH: 3-hydroxystearoylcarnitine. <sup>a</sup>Thiamine responsive lactic acidosis; Fibroblasts (FB); Muscle (M); Lymphocytes (LF); Pyruvate carboxylase (PC); Pyruvate dehydrogenase (PDH); Respiratory chain (RC); Coenzyme Q10 (COQ10). Normal lactate value in blood 1.8±0.5mmol/L; in CSF 1.6±0.3 mmol/L, and in urine 5-113 mmol/mol creatinine; Biochemical data for MDC scores: Lactate 2X in blood or CSF was scored as +2; alanine 2X was scored as +2; TCA (succinate, fumarate, malate); dicarboxylic acids (DC), 2HB, 3MGC were all scored as +1.

**Table S3.** Primers used for massive parallel sequencing of *GFM1* cDNA amplicons.

| Primer         | Tag Sequence           | Target-Specific Sequence | Oligonucleotide Sequence                   | Tag Name | Target Name |
|----------------|------------------------|--------------------------|--------------------------------------------|----------|-------------|
| Forward Primer | ACACTGACGACATGGTTCTACA | TTTCATCCGAGCAGGAGAAG     | ACACTGACGACATGGTTCTACATTTCATCCGAGCAGGAGAAG | CS1      | GFM1        |

# Supplementary information

|                       |                        |                       |                                             |     |      |
|-----------------------|------------------------|-----------------------|---------------------------------------------|-----|------|
| <b>Reverse Primer</b> | TACGGTAGCAGAGACTTGGTCT | GCATGACCTAAGTTCAGTGGA | TACGGTAGCAGAGACTTGGTCTGCATGACCTAAGTTCAGTGGA | CS2 | GFM1 |
|-----------------------|------------------------|-----------------------|---------------------------------------------|-----|------|

**Table S4.** Prediction of pathogenicity by different tools.

| Gene           | Nucleotide Variation                       | Polyphen2 (HumVar)         | Sift                   | Mutation Taster           | PROVEAN                | Mutation Assessor | Mutpred2 (score)                                                                                                                                             | Panther (PSEP)                                      |
|----------------|--------------------------------------------|----------------------------|------------------------|---------------------------|------------------------|-------------------|--------------------------------------------------------------------------------------------------------------------------------------------------------------|-----------------------------------------------------|
| <i>ACAD9</i>   | NM_014049.4:<br>c.473C>T<br>p.(Thr158Ile)  | benign 0.36                | DAMAGING<br>score 0    | polymorph                 | Deleterious -<br>4.48  | High 3.75         | Probably of deleterious<br>mutation P= 0.780 (Loss of<br>catalytic residue at T158 (P =<br>0.0286)                                                           | Not scored: No PANTHER<br>family for input sequence |
| <i>DLD</i>     | NM_000108.4:<br>c.259C>T<br>p.(Pro87Ser)   | probably<br>damaging 0.977 | DAMAGING<br>score 0    | disease<br>causing        | Deleterious -<br>7.62  | High 4.235        | Probably of deleterious<br>mutation P= 0.867                                                                                                                 | Not scored: No PANTHER<br>family for input sequence |
| <i>DLD</i>     | NM_000108.4:<br>c.788G>A<br>(p.Arg263His)  | probably<br>damaging 0.953 | DAMAGING<br>score 0    | disease<br>causing        | Deleterious -<br>3.921 | Medium<br>2.865   | Probably of deleterious<br>mutation P= 0.529                                                                                                                 | Not scored: No PANTHER<br>family for input sequence |
| <i>FARS2</i>   | NM_006567.3:<br>c.737C>T<br>p.(Thr246Met)  | probably<br>damaging 0.913 | DAMAGING<br>score 0.02 | polymorph                 | Deleterious -<br>3.551 | Medium<br>2.83    | Probably of deleterious<br>mutation P= 0.596                                                                                                                 | PROBABLY DAMAGING<br>(842)                          |
| <i>FARS2</i>   | NM_006567.3:<br>c.1082C>T<br>p.(Pro361Leu) | probably<br>damaging 0.992 | DAMAGING<br>score 0.01 | disease<br>causing (0.99) | Deleterious -<br>9.192 | High 3.54         | Probably of deleterious<br>mutation P= 0.907                                                                                                                 | PROBABLY DAMAGING<br>(1629)                         |
| <i>FOXRED1</i> | NM_017547.3:<br>c.628T>G<br>p.(Tyr210Asp)  | probably<br>damaging 0.924 | DAMAGING<br>score 0.02 | disease<br>causing        | Deleterious -<br>6.447 | High 3.64         | Probably of deleterious<br>mutation P=0.796 Gain of<br>disorder (p = 0.0129)<br>Loss of sheet (p = 0.0315)<br>Loss of phosphorylation at Y210<br>(p = 0.038) | Not scored: No PANTHER<br>family for input sequence |
| <i>FOXRED1</i> | NM_017547.3:<br>c.1273C>T<br>p.(His425Tyr) | probably<br>damaging 1.000 | DAMAGING<br>score 0    | disease<br>causing        | Deleterious -<br>5.637 | High 3.615        | Probably of deleterious<br>mutation P=0.650                                                                                                                  | Not scored: No PANTHER<br>family for input sequence |
| <i>GFM1</i>    | NM_024996.5:<br>c.2011C>T<br>p.(Arg671Cys) | probably<br>damaging 1.000 | DAMAGING<br>score 0    | disease<br>causing        | Deleterious -<br>7.06  | High 4.165        | Probability of deleterious<br>mutation P=0.858                                                                                                               | PROBABLY DAMAGING<br>(4200)                         |
| <i>MRPS22</i>  | NM_020191.2:<br>c.509G>A<br>p.(Arg170His)  | probably<br>damaging 1.000 | DAMAGING<br>score 0    | disease<br>causing        | Deleterious -<br>4.40  | Medium<br>3.19    | Probability of deleterious<br>mutation P=0.96                                                                                                                | PROBABLY DAMAGING<br>(1237)                         |
| <i>NPHS2</i>   | NM_014625.3:c.413<br>G>A<br>p.(Arg138Gln)  | probably<br>damaging 0.999 | DAMAGING<br>score 0.02 | disease<br>causing (0.99) | Deleterious -<br>3.839 | Medium<br>2.47    | Probably of deleterious<br>mutation P= 0.821                                                                                                                 | PROBABLY DAMAGING<br>(1237)                         |

# Supplementary information

| Gene         | Nucleotide Variation                                                                  | Polyphen2 (HumVar)         | Sift                   | Mutation Taster           | PROVEAN                | Mutation Assessor | Mutpred2 (score)                                                                                                                                           | Panther (PSEP)                                      |
|--------------|---------------------------------------------------------------------------------------|----------------------------|------------------------|---------------------------|------------------------|-------------------|------------------------------------------------------------------------------------------------------------------------------------------------------------|-----------------------------------------------------|
| <i>PDHA1</i> | NM_000284.3:<br>c.506C>T<br>p.(Ala169Val)                                             | probably<br>damaging 0.985 | DAMAGING<br>score 0    | disease<br>causing (0.99) | Deleterious -<br>3.853 | High 4.615        | Probability of deleterious<br>mutation P=0.950                                                                                                             | PROBABLY DAMAGING<br>(1629)                         |
| <i>PDHA1</i> | NM_000284.3:<br>c.787C>G<br>p.(Arg263Gly)                                             | probably<br>damaging 1.000 | DAMAGING<br>score 0    | disease<br>causing (0.99) | Deleterious -<br>6.542 | High 3.95         | Probably of deleterious<br>mutation P= 0.927                                                                                                               | PROBABLY DAMAGING<br>(1237)                         |
| <i>PDSS1</i> | NM_014317.3:c.716<br>T>G<br>p.(Val239Gly)                                             | probably<br>damaging 0.999 | DAMAGING<br>score 0    | disease<br>causing (0.99) | Deleterious -<br>6.456 | Medium<br>3.345   | Probability of deleterious<br>mutation P=0.738 (Loss of<br>stability (p = 0.0037)                                                                          | Not scored: No PANTHER<br>family for input sequence |
| <i>PHKA2</i> | NM_000292.2:c.124<br>6G>A<br>p.Gly416Arg<br>(ligada al X)<br>EXAC browser<br>0.003668 | probably<br>damaging 0.975 | DAMAGING<br>score 0    | disease<br>causing (0.99) | Deleterious -<br>5.45  | Medium<br>3.075   | Probability of deleterious<br>mutation P=0.312                                                                                                             | PROBABLY DAMAGING<br>(1036)                         |
| <i>TRMU</i>  | NM_018006.4:<br>c.680G>C<br>p.(Arg227Thr)                                             | probably<br>damaging 0.982 | DAMAGING<br>score 0    | disease<br>causing (0.99) | Deleterious -<br>5.547 | Medium 2.2<br>05  | Probability of deleterious<br>mutation P=0.708                                                                                                             | Not scored: No PANTHER<br>family for input sequence |
| <i>TSFM</i>  | NM_001172696.1:<br>c.782G>C<br>p.(Cys261Ser)                                          | Benign 0.02                | DAMAGING<br>score 0.02 | disease<br>causing (0.98) | Neutral -1.594         | Low 1.21          | Probability of deleterious<br>mutation P=0.747 (Gain of<br>disorder (p = 0.0016)                                                                           | PROBABLY DAMAGING<br>(455)                          |
| <i>TSFM</i>  | NM_001172696.1:<br>c.848G>A<br>p.(Gly283Asp)                                          | probable<br>damaging 0.999 | DAMAGING<br>score 0    | disease<br>causing (0.99) | Deleterious -<br>6.592 | Medium<br>2.925   | Probability of deleterious<br>mutation P=0.733 (Gain of<br>relative solvent accessibility (p =<br>0.0215)<br>Gain of solvent accessibility (p =<br>0.0306) | PROBABLY DAMAGING<br>(1368)                         |

In PolyPhen-2 (v2.2.2r398; <http://genetics.bwh.harvard.edu/pph2/>) using HumVar-trained model, scores above 0.9 were predicted as 'Probably Damaging', and those below 0.5 were predicted as 'benign'. In SIFT (v1.03; <http://sift.jcvi.org/>), the cut-off for damaging prediction of 0.05. MutationTaster (<http://www.mutationtaster.org/>) employs a Bayes classifier, model simple aae (single amino acid changes) or complex aae (frameshift or premature stop codon). In PROVEAN the cut-off was 2.5. MutPred contains a general pathogenicity score (P) and a ranked list of specific molecular alterations potentially affecting the phenotype, where p is the P-value that certain structural and functional properties are impacted. Scores with  $P > 0.5$  and  $p < 0.05$  are actionable hypotheses;  $P > 0.75$  and  $p < 0.05$  are confident hypotheses,  $P > 0.75$  and  $p < 0.01$  are very confident hypotheses. For Panther analysis, PSEP (position-specific evolutionary preservation measured in length of time (millions of years)). The thresholds chosen were: "probably damaging" (time > 450my; "possibly damaging" (450my > time > 200my) and "probably benign" (time < 200my).

## Supplementary information
